# Supplementary material for: Collective behavior of squirmers in thin films
Source: Royal Society of Chemistry journal article supplement (doi:10.1039/d4sm00075g), 2024-01-01
Supplement: d4sm00075g10.pdf [file d4sm00075g10.pdf]

## Supplementary Information for

### Collective behavior of squirmers in thin films

Bohan Wu-Zhang, Dmitry A. Fedosov, and Gerhard Gompper

Theoretical Physics of Living Matter, Institute of Biological Information  
Processing and Institute for Advanced Simulation, Forschungszentrum  
Jülich, 52425 Jülich, Germany

Email: [b.zhang@fz-juelich.de](mailto:b.zhang@fz-juelich.de), [d.fedosov@fz-juelich.de](mailto:d.fedosov@fz-juelich.de),  
[g.gompper@fz-juelich.de](mailto:g.gompper@fz-juelich.de)

## Supplementary Movies

- Movie S1: Gas-like state of pushers at the volume fraction  $\phi = 0.18$  ( $N_{sq} = 228$ ), active stress  $\beta = -5$ , and rotlet dipole strength  $\tilde{\lambda} = 0$ .
- Movie S2: Gas-like state of neutral squirmers at the volume fraction  $\phi = 0.18$  ( $N_{sq} = 228$ ), active stress  $\beta = 0$ , and rotlet dipole strength  $\tilde{\lambda} = 0$ .
- Movie S3: Motility-induced phase separation of pullers at the volume fraction  $\phi = 0.18$  ( $N_{sq} = 228$ ), active stress  $\beta = 5$ , and rotlet dipole strength  $\tilde{\lambda} = 0$ .
- Movie S4: Swarming of pushers at the volume fraction  $\phi = 0.35$  ( $N_{sq} = 456$ ), active stress  $\beta = -5$ , and rotlet dipole strength  $\tilde{\lambda} = 0$ . Different views, including  $x - z$  plane (top) and  $x - y$  plane (bottom), are shown.
- Movie S5: Motility-induced phase separation of neutral squirmers at the volume fraction  $\phi = 0.35$  ( $N_{sq} = 456$ ), active stress  $\beta = 0$ , and rotlet dipole strength  $\tilde{\lambda} = 0$ .
- Movie S6: Motility-induced phase separation of pullers at the volume fraction  $\phi = 0.35$  ( $N_{sq} = 456$ ), active stress  $\beta = 5$ , and rotlet dipole strength  $\tilde{\lambda} = 0$ . Different views, including  $x - z$  plane (top) and  $x - y$  plane (bottom), are shown.
- Movie S7: Swarming of pushers at the volume fraction  $\phi = 0.35$  ( $N_{sq} = 456$ ), active stress  $\beta = -5$ , and rotlet dipole strength  $\tilde{\lambda} = 133.5$ . Different views, including  $x - z$  plane (top) and  $x - y$  plane (bottom), are shown.
- Movie S8: Swarming of neutral squirmers at the volume fraction  $\phi = 0.35$  ( $N_{sq} = 456$ ), active stress  $\beta = 0$ , and rotlet dipole strength  $\tilde{\lambda} = 133.5$ .
- Movie S9: Swarming of pullers at the volume fraction  $\phi = 0.35$  ( $N_{sq} = 456$ ), active stress  $\beta = 5$ , and rotlet dipole strength  $\tilde{\lambda} = 133.5$ . Different views, including  $x - z$  plane (top) and  $x - y$  plane (bottom), are shown.
